# Supplementary material for: Identifying Biomarkers of Wharton’s Jelly Mesenchymal Stromal Cells Using a Dynamic Metabolic Model: The Cell Passage Effect
Source: PubMed Central journal article supplement (PMC5876007; doi:10.3390/metabo8010018), 2018-02-24
Supplement: metabolites-08-00018-s001.pdf [file metabolites-08-00018-s001.pdf]

# Supplementary Materials: Identifying biomarkers of Wharton's Jelly mesenchymal stem cells using a dynamic metabolic model: The cell passage effect

Benoît Laflaquiere, Gabrielle Leclercq, Chandarong Choey, Jingkui Chen, Sabine Peres, Caryn Ito, Mario Jolicoeur

Table S1. Reaction equations

| Reaction number | Reaction name | Reaction                                                                                                                             |
|-----------------|---------------|--------------------------------------------------------------------------------------------------------------------------------------|
| 1               | AAtoSUC       | $ELYS + EILE + ELEU + EVAL + ETYR + 7 AKG + ATP + 9 NAD + 2 NADP \Rightarrow 4 GLU + 3 SUC + MAL + 8 ACCOA + ADP + 9 NADH + 2 NADPH$ |
| 2               | AK            | $ATP + AMP \Rightarrow 2 ADP$                                                                                                        |
| 3               | AKGDH         | $AKG + NAD \Rightarrow SCOA + NADH$                                                                                                  |
| 4               | ALATA         | $GLU + PYR = AKG + EALA$                                                                                                             |
| 5               | ARG1          | $ARG \Rightarrow UREA + ORN$                                                                                                         |
| 6               | ARGt          | $EARG + ATP \Rightarrow ARG + ADP$                                                                                                   |
| 7               | ASL           | $AS \Rightarrow FUM + ARG$                                                                                                           |
| 8               | ASN           | $ASN = ASP + NH4$                                                                                                                    |
| 9               | ASNt          | $EASN + ATP \Rightarrow ASN + ADP$                                                                                                   |
| 10              | ASPt          | $EASP + ATP \Rightarrow ASP + ADP$                                                                                                   |
| 11              | ASS           | $CTR + ASP + ATP \Rightarrow AS + AMP$                                                                                               |
| 12              | ASTA          | $ASP + AKG = OXA + GLU$                                                                                                              |
| 13              | ATPase        | $ATP \Rightarrow ADP$                                                                                                                |
| 14              | CITS          | $CIT + NAD \Rightarrow AKG + NADH$                                                                                                   |
| 15              | CK            | $ADP + PCr = ATP + Cr$                                                                                                               |
| 16              | CS            | $ACCOA + OXA \Rightarrow CIT$                                                                                                        |
| 17              | FUM           | $FUM \Rightarrow MAL$                                                                                                                |

Table S1. Reaction equations (continued)

| Reaction number | Reaction name | Reaction                                                                                                                                                                                                                                                                                                              |
|-----------------|---------------|-----------------------------------------------------------------------------------------------------------------------------------------------------------------------------------------------------------------------------------------------------------------------------------------------------------------------|
| 18              | G6PDH         | $G6P + 2 NADP \Rightarrow R5P + 2 NADPH$                                                                                                                                                                                                                                                                              |
| 19              | GLDH          | $GLU + NAD = AKG + NADH + NH_4$                                                                                                                                                                                                                                                                                       |
| 20              | GLN           | $GLN = NH_4 + GLU$                                                                                                                                                                                                                                                                                                    |
| 21              | GLNt          | $EGLN + ATP \Rightarrow GLN + ADP$                                                                                                                                                                                                                                                                                    |
| 22              | GLUt          | $GLU + ADP \Rightarrow EGLU + ATP$                                                                                                                                                                                                                                                                                    |
| 23              | GLYt          | $EGLY + ATP \Rightarrow GLY + ADP$                                                                                                                                                                                                                                                                                    |
| 24              | growth        | $0.06 EALA + 0.04 EARG + 0.03 EASN + 0.04 EASP + 0.02 ECYS + 0.03 EGLN + 0.04 EGLU + 0.06 EGLY + 0.02 EHIS + 0.03 EILE + 0.06 ELEU + 0.06 ELYS + 0.01 EMET + 0.02 EPHE + 0.03 EPRO + 0.05 ESER + 0.04 ETHR + 0.005 ETRP + 0.02 ETYR + 0.04 EVAL + 3.78 ATP + 0.03 G6P + 0.03 R5P + 0.09 CIT \Rightarrow X + 3.78 ADP$ |
| 25              | HISARGTA      | $EHIS + EARG + AKG \Rightarrow 4 GLU + NH_4$                                                                                                                                                                                                                                                                          |
| 26              | HK            | $EGLC + ATP \Rightarrow G6P + ADP$                                                                                                                                                                                                                                                                                    |
| 27              | IDO           | $ETRP \Rightarrow KYN$                                                                                                                                                                                                                                                                                                |
| 28              | iNOS          | $ARG + NADP \Rightarrow CTR + NADPH + NO$                                                                                                                                                                                                                                                                             |
| 29              | KOT           | $KYN + AKG \Rightarrow KYT + GLU$                                                                                                                                                                                                                                                                                     |
| 30              | LDH           | $PYR + NADH \Rightarrow ELAC + NAD$                                                                                                                                                                                                                                                                                   |
| 31              | leak          | $2 NADH \Rightarrow 2 NAD$                                                                                                                                                                                                                                                                                            |
| 32              | ME            | $MAL + NAD \Rightarrow PYR + NADH$                                                                                                                                                                                                                                                                                    |
| 33              | MLD           | $MAL + NAD \Rightarrow OXA + NADH$                                                                                                                                                                                                                                                                                    |
| 34              | NADPHox       | $NADPH \Rightarrow NADP$                                                                                                                                                                                                                                                                                              |
| 35              | NAT           | $2 R5P + 2 ATP + GLN \Rightarrow NAD + AMP + GLU$                                                                                                                                                                                                                                                                     |
| 36              | NHG           | $NAD + ATP \Rightarrow NADP + ADP$                                                                                                                                                                                                                                                                                    |
| 37              | OCT           | $ORN \Rightarrow CTR$                                                                                                                                                                                                                                                                                                 |
| 38              | PC            | $PYR + ATP \Rightarrow OXA + ADP$                                                                                                                                                                                                                                                                                     |

Table S1. Reaction equations (continued)

| Reaction number | Reaction name | Reaction                                                                                                                                 |
|-----------------|---------------|------------------------------------------------------------------------------------------------------------------------------------------|
| 39              |               | $\text{PYR} + \text{NAD} \Rightarrow \text{ACCOA} + \text{NADH}$                                                                         |
| 40              | PFK           | $\text{F6P} + \text{ATP} \Rightarrow 2 \text{GAP} + \text{ADP}$                                                                          |
| 41              | PGI           | $\text{G6P} = \text{F6P}$                                                                                                                |
| 42              | PGK           | $\text{GAP} + \text{ADP} + \text{NAD} \Rightarrow \text{PEP} + \text{ATP} + \text{NADH}$                                                 |
| 43              | PK            | $\text{PEP} + \text{ADP} \Rightarrow \text{PYR} + \text{ATP}$                                                                            |
| 44              | PPRibP        | $\text{R5P} + 2 \text{GLN} + \text{ASP} + \text{GLY} + 5 \text{ATP} \Rightarrow 2 \text{GLU} + \text{FUM} + 4 \text{ADP} + 2 \text{AMP}$ |
| 45              | resp          | $2 \text{NADH} + 4 \text{ADP} \Rightarrow 2 \text{NAD} + 4 \text{ATP}$                                                                   |
| 46              | SCOAS         | $\text{SCOA} + \text{ADP} \Rightarrow \text{ATP} + \text{SUC}$                                                                           |
| 47              | SDH           | $\text{SUC} + 0.66 \text{NAD} + \text{ADP} \Rightarrow \text{FUM} + 0.66 \text{NADH} + \text{ATP}$                                       |
| 48              | SDHH          | $\text{ESER} \Rightarrow \text{PYR} + \text{NH}_4$                                                                                       |
| 49              | TK            | $3 \text{R5P} \Rightarrow 2 \text{F6P} + \text{GAP}$                                                                                     |

Table S2. Successive steps for model calibration

| Step number | Used metabolite | Determined reactions | Step number | Used metabolite | Determined reactions |
|-------------|-----------------|----------------------|-------------|-----------------|----------------------|
| 1           | X               | growth               | 24          | ASN             | ASN                  |
| 2           | PCr             | CK                   | 25          | ASP             | ASTA                 |
| 3           | EGLC            | HK                   | 26          | ACCOA           | CS & PDH             |
| 4           | ELAC            | LDH                  | 27          | CIT             | CITS                 |
| 5           | ETRP            | IDO                  | 28          | AKG             | AKGDH & GLD          |
| 6           | KYN             | KOT                  | 29          | SCOA            | SCOAS                |
| 7           | ELEU            | AAtoSUC              | 30          | SUC             | SDH                  |
| 8           | EHIS            | HISARGTA             | 31          | NH4             | GLN                  |
| 9           | EGLY            | GLYt                 | 32          | FUM             | FUM                  |
| 10          | UREA            | ARG1                 | 33          | GLN             | NAT                  |
| 11          | NO              | iNOS                 | 34          | AMP             | AK                   |
| 12          | R5P             | PPRibP               | 35          | G6P             | G6PDH & PGI          |
| 13          | R5P             | NAT.                 | 36          | NADPH           | NADPHox              |
| 14          | EARG            | ARGt                 | 37          | NADP            | NHG                  |
| 15          | EGLU            | GLUt                 | 38          | F6P             | PFK & TK             |
| 16          | EGLN            | GLNt                 | 39          | GAP             | PGK                  |
| 17          | EALA            | ALATA                | 40          | PEP             | PK                   |
| 18          | ESER            | SDHH                 | 41          | R5P             | EP                   |
| 19          | EASN            | ASNt                 | 42          | MAL             | ME & MLD             |
| 20          | EASP            | ASPt                 | 43          | OXA             | PC                   |
| 21          | ORN             | OCT                  | 44          | ADP             | ATPase & resp        |
| 22          | CTR             | ASS                  | 45          | NAD             | leak                 |
| 23          | AS·ARG          | ASL                  |             |                 |                      |

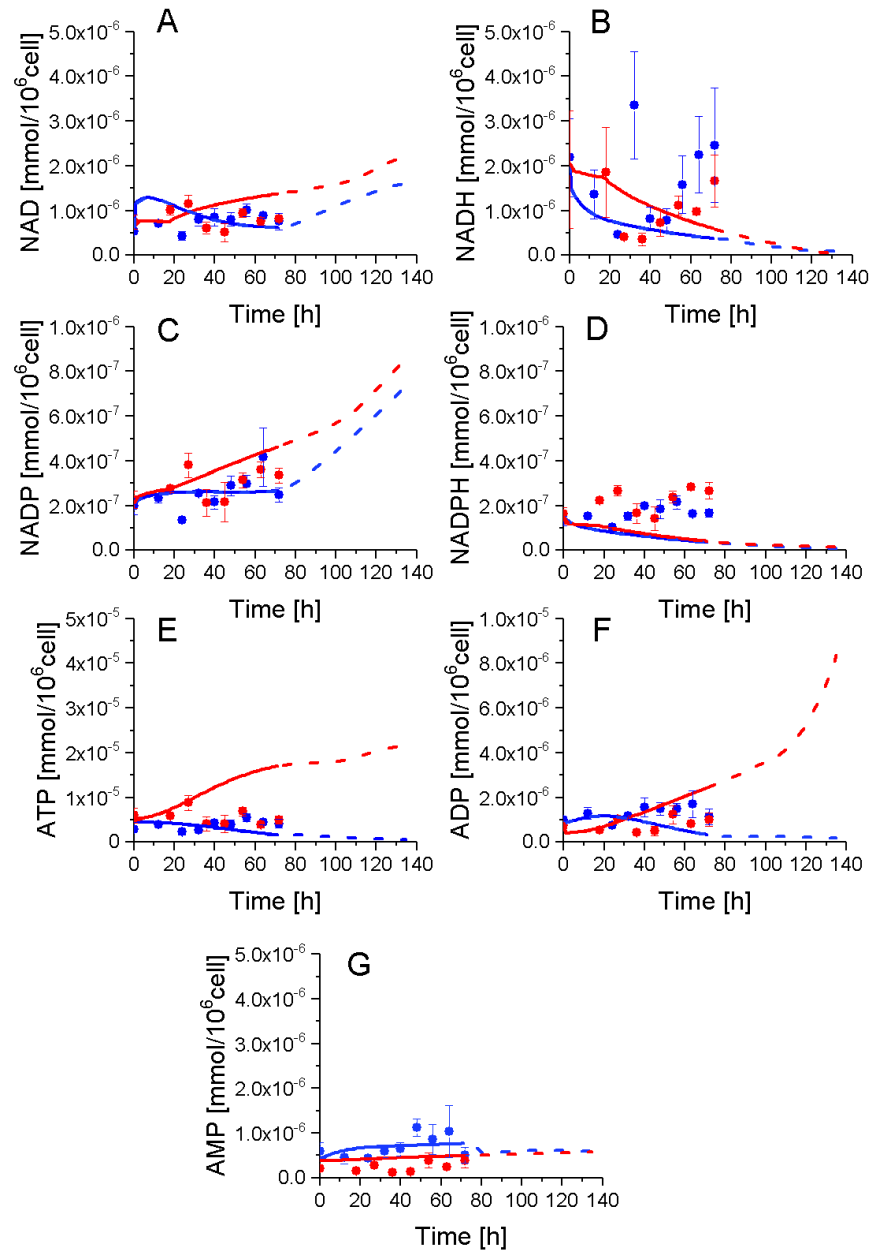

**Figure S1.** Experimental data and model simulation of cofactors and nucleotides concentrations: (A) Nicotinamide adenine dinucleotide concentration; (B) Nicotinamide adenine dinucleotide H concentration; (C) Nicotinamide adenine dinucleotide phosphate concentration; (D) Nicotinamide adenine dinucleotide phosphate H concentration; (E) Adenosine triphosphate concentration; (F) Adenosine diphosphate concentration; (G) Adenosine monophosphate concentration. ■ are P4 cells experimental data, ● are P9 cells experimental. Data Average values are shown for both passages (n=3). Blue line is P4 cells simulation, red line is P9 cells simulation.

**Table S3.** Parameter values for average simulation

| Parameters       | Values                 | Units                                          | Parameters           | Values                 | Units                             |
|------------------|------------------------|------------------------------------------------|----------------------|------------------------|-----------------------------------|
| $vmax_{AAtoSUC}$ | $6.20 \times 10^{-04}$ | $mmol \cdot 10^{-6} \text{cells} \cdot h^{-1}$ | $km_{growth_{EPHE}}$ | $1.60 \times 10^{-02}$ | mM                                |
| $vmax_{AK}$      | $1.92 \times 10^{-04}$ | $mmol \cdot 10^{-6} \text{cells} \cdot h^{-1}$ | $km_{growth_{EPRO}}$ | $1.00 \times 10^{-02}$ | mM                                |
| $vmax_{AKGDH}$   | $1.53 \times 10^{-03}$ | $mmol \cdot 10^{-6} \text{cells} \cdot h^{-1}$ | $km_{growth_{ESER}}$ | $1.10 \times 10^{-03}$ | mM                                |
| $vmax_{ALATA}$   | $1.09 \times 10^{-04}$ | $mmol \cdot 10^{-6} \text{cells} \cdot h^{-1}$ | $km_{growth_{ETHR}}$ | $9.60 \times 10^{-03}$ | mM                                |
| $vmax_{ARG1}$    | $1.88 \times 10^{-04}$ | $mmol \cdot 10^{-6} \text{cells} \cdot h^{-1}$ | $Km_{growth_{ETYS}}$ | $1.20 \times 10^{-02}$ | mM                                |
| $vmax_{ARGt}$    | $5.15 \times 10^{-05}$ | $mmol \cdot 10^{-6} \text{cells} \cdot h^{-1}$ | $km_{growth_{EVAL}}$ | $1.30 \times 10^{-02}$ | mM                                |
| $vmax_{ASL}$     | $1.33 \times 10^{-04}$ | $mmol \cdot 10^{-6} \text{cells} \cdot h^{-1}$ | $km_{growth_{G6P}}$  | $9.90 \times 10^{-13}$ | $mmol \cdot 10^{-6} \text{cells}$ |
| $vmax_{ASN}$     | $5.00 \times 10^{-06}$ | $mmol \cdot 10^{-6} \text{cells} \cdot h^{-1}$ | $km_{growth_{R5P}}$  | $5.82 \times 10^{-12}$ | $mmol \cdot 10^{-6} \text{cells}$ |
| $vmax_{ASNT}$    | $5.47 \times 10^{-06}$ | $mmol \cdot 10^{-6} \text{cells} \cdot h^{-1}$ | $km_{HISARGTAAKG}$   | $5.49 \times 10^{-06}$ | $mmol \cdot 10^{-6} \text{cells}$ |
| $vmax_{ASPt}$    | $9.29 \times 10^{-12}$ | $mmol \cdot 10^{-6} \text{cells} \cdot h^{-1}$ | $km_{HISARGTAEARG}$  | $4.00 \times 10^{-01}$ | mM                                |
| $vmax_{ASS}$     | $1.20 \times 10^{-03}$ | $mmol \cdot 10^{-6} \text{cells} \cdot h^{-1}$ | $km_{HISARGTAEHIS}$  | $1.50 \times 10^{-01}$ | mM                                |
| $vmax_{ASTA}$    | $8.90 \times 10^{-07}$ | $mmol \cdot 10^{-6} \text{cells} \cdot h^{-1}$ | $km_{HKATP}$         | $6.00 \times 10^{-05}$ | /                                 |
| $vmax_{ATPase}$  | $6.64 \times 10^{-03}$ | $mmol \cdot 10^{-6} \text{cells} \cdot h^{-1}$ | $km_{HKEGLC}$        | 5.00                   | mM                                |
| $vmax_{CITS}$    | $1.08 \times 10^{-03}$ | $mmol \cdot 10^{-6} \text{cells} \cdot h^{-1}$ | $ki_{HK_{G6P}}$      | $1.00 \times 10^{-07}$ | $mmol \cdot 10^{-6} \text{cells}$ |
| $vmax_{CK}$      | $2.04 \times 10^{-06}$ | $mmol \cdot 10^{-6} \text{cells} \cdot h^{-1}$ | $ka_{HKAMP_{ATP}}$   | $1.00 \times 10^{-02}$ | /                                 |

Table S3. Parameter values for average simulation (continued)

| Parameters        | Values                 | Units                                   | Parameters                | Values                 | Units                      |
|-------------------|------------------------|-----------------------------------------|---------------------------|------------------------|----------------------------|
| $vmax_{CS}$       | $1.08 \times 10^{-03}$ | $mmol \cdot 10^{-6} cells \cdot h^{-1}$ | $alpha_{HK_{AMP_{ATP}}}$  | 1.10                   | /                          |
| $vmax_{FUM}$      | $1.43 \times 10^{-03}$ | $mmol \cdot 10^{-6} cells \cdot h^{-1}$ | $beta_{HK_{AMP_{ATP}}}$   | 1.05                   | /                          |
| $vmax_{G6PDH}$    | $5.00 \times 10^{-05}$ | $mmol \cdot 10^{-6} cells \cdot h^{-1}$ | $km_{IDO_{ETRP}}$         | $1.00 \times 10^{-02}$ | mM                         |
| $vmax_{GLDH}$     | $6.25 \times 10^{-08}$ | $mmol \cdot 10^{-6} cells \cdot h^{-1}$ | $km_{iNOS_{ARG}}$         | $1.00 \times 10^{-03}$ | $mmol \cdot 10^{-6} cells$ |
| $vmax_{GLN}$      | $1.07 \times 10^{-01}$ | $mmol \cdot 10^{-6} cells \cdot h^{-1}$ | $km_{iNOS_{NADP}}$        | $3.00 \times 10^{-07}$ | /                          |
| $vmax_{GLNt}$     | $2.28 \times 10^{-04}$ | $mmol \cdot 10^{-6} cells \cdot h^{-1}$ | $km_{KOT_{KYN}}$          | $1.00 \times 10^{-02}$ | mM                         |
| $vmax_{GLUt}$     | $3.15 \times 10^{-05}$ | $mmol \cdot 10^{-6} cells \cdot h^{-1}$ | $km_{KOT_{AKG}}$          | $1.00 \times 10^{-07}$ | $mmol \cdot 10^{-6} cells$ |
| $vmax_{GLYt}$     | $1.59 \times 10^{-06}$ | $mmol \cdot 10^{-6} cells \cdot h^{-1}$ | $km_{LDH_{NADH}}$         | $1.01 \times 10^{-07}$ | /                          |
| $vmax_{growth}$   | $6.97 \times 10^{-02}$ | $h^{-1}$                                | $km_{LDH_{PYR}}$          | $1.08 \times 10^{-07}$ | $mmol \cdot 10^{-6} cells$ |
| $vmax_{HISARGTA}$ | $1.90 \times 10^{-05}$ | $mmol \cdot 10^{-6} cells \cdot h^{-1}$ | $ki_{LDH_{PYR}}$          | $4.50 \times 10^{-07}$ | $mmol \cdot 10^{-6} cells$ |
| $vmax_{HK}$       | $1.00 \times 10^{-03}$ | $mmol \cdot 10^{-6} cells \cdot h^{-1}$ | $ka_{LDH_{AMP_{ATP}}}$    | $9.00 \times 10^{-02}$ | /                          |
| $vmax_{IDO}$      | $1.35 \times 10^{-05}$ | $mmol \cdot 10^{-6} cells \cdot h^{-1}$ | $alpha_{LDH_{AMP_{ATP}}}$ | $4.65 \times 10^{-01}$ | /                          |
| $vmax_{iNOS}$     | $1.21 \times 10^{-06}$ | $mmol \cdot 10^{-6} cells \cdot h^{-1}$ | $beta_{LDH_{AMP_{ATP}}}$  | $1.20 \times 10^{+01}$ | /                          |
| $vmax_{KOT}$      | $1.11 \times 10^{-05}$ | $mmol \cdot 10^{-6} cells \cdot h^{-1}$ | $km_{leak_{NADH}}$        | $1.00 \times 10^{-06}$ | /                          |
| $vmax_{LDH}$      | $8.80 \times 10^{-05}$ | $mmol \cdot 10^{-6} cells \cdot h^{-1}$ | $km_{ME_{NAD}}$           | $1.00 \times 10^{-06}$ | /                          |
| $vmax_{leak}$     | $2.39 \times 10^{-03}$ | $mmol \cdot 10^{-6} cells \cdot h^{-1}$ | $km_{ME_{MAL}}$           | $1.00 \times 10^{-06}$ | $mmol \cdot 10^{-6} cells$ |

Table S3. Parameter values for average simulation (continued)

| Parameters       | Values                 | Units                                          | Parameters          | Values                 | Units                             |
|------------------|------------------------|------------------------------------------------|---------------------|------------------------|-----------------------------------|
| $vmax_{ME}$      | $1.00 \times 10^{-06}$ | $mmol \cdot 10^{-6} \text{cells} \cdot h^{-1}$ | $km_{MLDMAL}$       | $1.00 \times 10^{-06}$ | $mmol \cdot 10^{-6} \text{cells}$ |
| $vmax_{MLD}$     | $1.53 \times 10^{-03}$ | $mmol \cdot 10^{-6} \text{cells} \cdot h^{-1}$ | $km_{MLDNAD}$       | $1.00 \times 10^{-06}$ | /                                 |
| $vmax_{NADPHox}$ | $5.33 \times 10^{-05}$ | $mmol \cdot 10^{-6} \text{cells} \cdot h^{-1}$ | $km_{NADPHoxNADPH}$ | $1.00 \times 10^{-07}$ | /                                 |
| $vmax_{NAT}$     | $5.00 \times 10^{-08}$ | $mmol \cdot 10^{-6} \text{cells} \cdot h^{-1}$ | $km_{NATR5P}$       | $1.00 \times 10^{-10}$ | $mmol \cdot 10^{-6} \text{cells}$ |
| $vmax_{NHG}$     | $1.40 \times 10^{-08}$ | $mmol \cdot 10^{-6} \text{cells} \cdot h^{-1}$ | $km_{NATATP}$       | $5.00 \times 10^{-06}$ | /                                 |
| $vmax_{OCT}$     | $1.42 \times 10^{-04}$ | $mmol \cdot 10^{-6} \text{cells} \cdot h^{-1}$ | $km_{NATGLN}$       | $4.00 \times 10^{-03}$ | $mmol \cdot 10^{-6} \text{cells}$ |
| $vmax_{PC}$      | $7.90 \times 10^{-07}$ | $mmol \cdot 10^{-6} \text{cells} \cdot h^{-1}$ | $km_{NHGNAD}$       | $1.00 \times 10^{-06}$ | $mmol \cdot 10^{-6} \text{cells}$ |
| $vmax_{PDH}$     | $1.17 \times 10^{-03}$ | $mmol \cdot 10^{-6} \text{cells} \cdot h^{-1}$ | $km_{NHGATP}$       | $5.00 \times 10^{-06}$ | /                                 |
| $vmax_{PFK}$     | $2.12 \times 10^{-04}$ | $mmol \cdot 10^{-6} \text{cells} \cdot h^{-1}$ | $km_{OCTORN}$       | $5.01 \times 10^{-02}$ | $mmol \cdot 10^{-6} \text{cells}$ |
| $vmax_{PGI}$     | $9.73 \times 10^{-02}$ | $mmol \cdot 10^{-6} \text{cells} \cdot h^{-1}$ | $km_{PCATP}$        | $5.00 \times 10^{-06}$ | /                                 |
| $vmax_{PGK}$     | $2.80 \times 10^{-02}$ | $mmol \cdot 10^{-6} \text{cells} \cdot h^{-1}$ | $km_{PCPYR}$        | $1.00 \times 10^{-07}$ | $mmol \cdot 10^{-6} \text{cells}$ |
| $vmax_{PK}$      | $9.51 \times 10^{-04}$ | $mmol \cdot 10^{-6} \text{cells} \cdot h^{-1}$ | $km_{PDHNAD}$       | $1.00 \times 10^{-08}$ | /                                 |
| $vmax_{PPRibP}$  | $2.40 \times 10^{01}$  | $mmol \cdot 10^{-6} \text{cells} \cdot h^{-1}$ | $km_{PDHPYR}$       | $2.00 \times 10^{-07}$ | $mmol \cdot 10^{-6} \text{cells}$ |
| $vmax_{resp}$    | $7.20 \times 10^{-04}$ | $mmol \cdot 10^{-6} \text{cells} \cdot h^{-1}$ | $km_{PFKATP}$       | $3.58 \times 10^{-09}$ | /                                 |
| $vmax_{SCOAS}$   | $1.42 \times 10^{-03}$ | $mmol \cdot 10^{-6} \text{cells} \cdot h^{-1}$ | $km_{PFKF6P}$       | $3.00 \times 10^{-07}$ | $mmol \cdot 10^{-6} \text{cells}$ |
| $vmax_{SDH}$     | $1.39 \times 10^{-03}$ | $mmol \cdot 10^{-6} \text{cells} \cdot h^{-1}$ | $ka_{PFKAMPATP}$    | $9.00 \times 10^{-02}$ | /                                 |



Table S3. Parameter values for average simulation (continued)

| Parameters          | Values                 | Units                                          | Parameters                | Values                 | Units                             |
|---------------------|------------------------|------------------------------------------------|---------------------------|------------------------|-----------------------------------|
| $vmax_{SDHH}$       | $1.21 \times 10^{-05}$ | $mmol \cdot 10^{-6} \text{cells} \cdot h^{-1}$ | $alpha_{PFK_{AMP_{ATP}}}$ | $4.70 \times 10^{-01}$ | /                                 |
| $vmax_{TK}$         | $1.98 \times 10^{-06}$ | $mmol \cdot 10^{-6} \text{cells} \cdot h^{-1}$ | $beta_{PFK_{AMP_{ATP}}}$  | $1.05 \times 10^{+01}$ | /                                 |
| $vmaxr_{AK}$        | $1.93 \times 10^{-05}$ | $mmol \cdot 10^{-6} \text{cells} \cdot h^{-1}$ | $km_{PGI_{F6P}}$          | $2.01 \times 10^{-05}$ | $mmol \cdot 10^{-6} \text{cells}$ |
| $vmaxr_{ASTA}$      | $3.16 \times 10^{-04}$ | $mmol \cdot 10^{-6} \text{cells} \cdot h^{-1}$ | $km_{PGI_{G6P}}$          | $1.32 \times 10^{-06}$ | $mmol \cdot 10^{-6} \text{cells}$ |
| $vmaxr_{ASN}$       | $1.00 \times 10^{-08}$ | $mmol \cdot 10^{-6} \text{cells} \cdot h^{-1}$ | $ki_{PGI_{PEP}}$          | $3.70 \times 10^{-07}$ | $mmol \cdot 10^{-6} \text{cells}$ |
| $vmaxr_{CK}$        | $1.97 \times 10^{-06}$ | $mmol \cdot 10^{-6} \text{cells} \cdot h^{-1}$ | $km_{PGK_{ADP}}$          | $2.51 \times 10^{-08}$ | /                                 |
| $vmaxr_{PGI}$       | $1.97 \times 10^{-06}$ | $mmol \cdot 10^{-6} \text{cells} \cdot h^{-1}$ | $km_{PGK_{GAP}}$          | $1.02 \times 10^{-06}$ | $mmol \cdot 10^{-6} \text{cells}$ |
| $vmaxr_{ALATA}$     | $6.07 \times 10^{-05}$ | $mmol \cdot 10^{-6} \text{cells} \cdot h^{-1}$ | $km_{PGK_{NAD}}$          | $2.21 \times 10^{-08}$ | /                                 |
| $vmaxr_{GLN}$       | $1.79 \times 10^{-01}$ | $mmol \cdot 10^{-6} \text{cells} \cdot h^{-1}$ | $km_{PK_{ADP}}$           | $1.47 \times 10^{-04}$ | /                                 |
| $vmaxr_{GLDH}$      | $5.22 \times 10^{-05}$ | $mmol \cdot 10^{-6} \text{cells} \cdot h^{-1}$ | $km_{PK_{PEP}}$           | $7.92 \times 10^{-08}$ | $mmol \cdot 10^{-6} \text{cells}$ |
| $v_{growth_{ATP}}$  | $1.19 \times 10^{-02}$ | $mmol \cdot 10^{-6} \text{cells}$              | $ka_{PK_{F6P}}$           | $2.09 \times 10^{-08}$ | $mmol \cdot 10^{-6} \text{cells}$ |
| $v_{growth_{ADP}}$  | $1.19 \times 10^{-02}$ | $mmol \cdot 10^{-6} \text{cells}$              | $alpha_{PK_{F6P}}$        | $9.89 \times 10^{-01}$ | $mmol \cdot 10^{-6} \text{cells}$ |
| $v_{growth_{CIT}}$  | $2.73 \times 10^{-04}$ | $mmol \cdot 10^{-6} \text{cells}$              | $beta_{PK_{F6P}}$         | 1.89                   | $mmol \cdot 10^{-6} \text{cells}$ |
| $v_{growth_{EALA}}$ | $1.89 \times 10^{-04}$ | $mmol \cdot 10^{-6} \text{cells}$              | $km_{PPRibP_{ASP}}$       | $5.00 \times 10^{-01}$ | $mmol \cdot 10^{-6} \text{cells}$ |
| $v_{growth_{EARG}}$ | $1.19 \times 10^{-04}$ | $mmol \cdot 10^{-6} \text{cells}$              | $km_{PPRibP_{ATP}}$       | $5.00 \times 10^{-06}$ | /                                 |
| $v_{growth_{EASN}}$ | $9.07 \times 10^{-05}$ | $mmol \cdot 10^{-6} \text{cells}$              | $km_{PPRibP_{GLN}}$       | 3.00                   | $mmol \cdot 10^{-6} \text{cells}$ |

Table S3. Parameter values for average simulation (continued)

| Parameters          | Values                 | Units                       | Parameters          | Values                 | Units                       |
|---------------------|------------------------|-----------------------------|---------------------|------------------------|-----------------------------|
| $v_{growth_{EASP}}$ | $1.13 \times 10^{-04}$ | mmol·10 <sup>-6</sup> cells | $km_{PPRibP_{GLY}}$ | $2.00 \times 10^{-01}$ | mmol·10 <sup>-6</sup> cells |
| $v_{growth_{ECYS}}$ | $4.57 \times 10^{-05}$ | mmol·10 <sup>-6</sup> cells | $km_{PPRibP_{R5P}}$ | $1.00 \times 10^{-11}$ | mmol·10 <sup>-6</sup> cells |
| $v_{growth_{EGLN}}$ | $1.01 \times 10^{-04}$ | mmol·10 <sup>-6</sup> cells | $km_{resp_{ADP}}$   | $1.00 \times 10^{-06}$ | mmol·10 <sup>-6</sup> cells |
| $v_{growth_{EGLU}}$ | $1.22 \times 10^{-04}$ | mmol·10 <sup>-6</sup> cells | $km_{resp_{NADH}}$  | $2.00 \times 10^{-06}$ | /                           |
| $v_{growth_{EGLY}}$ | $1.69 \times 10^{-04}$ | mmol·10 <sup>-6</sup> cells | $km_{SCOAS_{ADP}}$  | $1.00 \times 10^{-06}$ | /                           |
| $v_{growth_{EHIS}}$ | $4.50 \times 10^{-05}$ | mmol·10 <sup>-6</sup> cells | $km_{SCOAS_{SCOA}}$ | $4.00 \times 10^{-07}$ | mmol·10 <sup>-6</sup> cells |
| $v_{growth_{EILE}}$ | $1.02 \times 10^{-04}$ | mmol·10 <sup>-6</sup> cells | $km_{SDH_{ADP}}$    | $1.00 \times 10^{-06}$ | /                           |
| $v_{growth_{ELEU}}$ | $1.78 \times 10^{-04}$ | mmol·10 <sup>-6</sup> cells | $km_{SDH_{NAD}}$    | $1.00 \times 10^{-06}$ | mM                          |
| $v_{growth_{ELYS}}$ | $1.80 \times 10^{-04}$ | mmol·10 <sup>-6</sup> cells | $km_{SDH_{SUC}}$    | $3.00 \times 10^{-07}$ | mmol·10 <sup>-6</sup> cells |
| $v_{growth_{EMET}}$ | $4.35 \times 10^{-05}$ | mmol·10 <sup>-6</sup> cells | $km_{SDH_{ESER}}$   | $1.00 \times 10^{-01}$ | mM                          |
| $v_{growth_{EPHE}}$ | $6.90 \times 10^{-05}$ | mmol·10 <sup>-6</sup> cells | $km_{TK_{R5P}}$     | $1.09 \times 10^{-07}$ | mmol·10 <sup>-6</sup> cells |
| $v_{growth_{EPRO}}$ | $9.86 \times 10^{-05}$ | mmol·10 <sup>-6</sup> cells |                     |                        |                             |
| $v_{growth_{ESER}}$ | $1.35 \times 10^{-04}$ | mmol·10 <sup>-6</sup> cells |                     |                        |                             |
| $v_{growth_{ETHR}}$ | $1.22 \times 10^{-04}$ | mmol·10 <sup>-6</sup> cells |                     |                        |                             |
| $v_{growth_{ETRP}}$ | $1.39 \times 10^{-05}$ | mmol·10 <sup>-6</sup> cells |                     |                        |                             |
| $v_{growth_{ETYR}}$ | $5.73 \times 10^{-05}$ | mmol·10 <sup>-6</sup> cells |                     |                        |                             |

**Table S3.** Parameter values for average simulation (continued)

| <b>Parameters</b>   | <b>Values</b>          | <b>Units</b>                |
|---------------------|------------------------|-----------------------------|
| $v_{growth_{EVAL}}$ | $1.31 \times 10^{-04}$ | mmol·10 <sup>-6</sup> cells |
| $v_{growth_{G6P}}$  | $8.79 \times 10^{-05}$ | mmol·10 <sup>-6</sup> cells |
| $v_{growth_{R5P}}$  | $7.34 \times 10^{-05}$ | mM                          |

**Table S4.** MRM transition and retention time of each amino acid

| Compound name     | IS  | Precursor ion | Product ion | frag | CE | polarity | RT min |
|-------------------|-----|---------------|-------------|------|----|----------|--------|
| Cystine           | NO  | 241.3         | 241         | 76   | 0  | pos      | 14.78  |
| Homoarginine      | YES | 189.2         | 144         | 92   | 12 | pos      | 14.44  |
| Tyrosine          | NO  | 182.2         | 136.1       | 66   | 8  | pos      | 8.74   |
| Homophenylalanine | YES | 180.2         | 134.1       | 75   | 8  | pos      | 6.12   |
| Arginine          | NO  | 175.2         | 70.1        | 95   | 24 | pos      | 15.09  |
| Phenylalanine     | NO  | 166.2         | 120.1       | 72   | 8  | pos      | 6.92   |
| Histidine         | NO  | 156.2         | 110.1       | 81   | 12 | pos      | 16.84  |
| Methionine-d3     | YES | 153.2         | 136.1       | 69   | 4  | pos      | 8.22   |
| Methionine        | NO  | 150.2         | 133         | 63   | 4  | pos      | 8.18   |
| Glutamic acid     | NO  | 148.1         | 84.1        | 72   | 16 | pos      | 12.59  |
| Lysine            | NO  | 147.2         | 84.1        | 66   | 12 | pos      | 15.48  |
| Glutamine         | NO  | 147.2         | 84.1        | 72   | 16 | pos      | 11.3   |
| Aspartic acid     | NO  | 134.1         | 74.1        | 61   | 12 | pos      | 14.23  |
| Asparagine        | NO  | 133.1         | 74          | 60   | 12 | pos      | 11.87  |
| Isoleucine        | NO  | 132.2         | 86.1        | 63   | 4  | pos      | 7.431  |
| Leucine           | NO  | 132.2         | 86.1        | 72   | 4  | pos      | 7.431  |
| Threonine         | NO  | 120.1         | 103.1       | 133  | 16 | pos      | 6.94   |
| Valine            | NO  | 118.2         | 72.1        | 55   | 8  | pos      | 9      |
| Proline           | NO  | 116.1         | 70.1        | 75   | 12 | pos      | 9.6    |
| Serine            | NO  | 106.1         | 60.1        | 60   | 8  | pos      | 11.62  |
| Alanine           | NO  | 90.1          | 44.1        | 42   | 8  | pos      | 10.7   |
| Glycine           | NO  | 76.1          | 30.1        | 39   | 4  | pos      | 11.47  |

Table S5. Flux kinetic equations

| Number | Flux                                                                                                                                                                                                                                                                                                                                                                                                                                                                                                                                                                                 |
|--------|--------------------------------------------------------------------------------------------------------------------------------------------------------------------------------------------------------------------------------------------------------------------------------------------------------------------------------------------------------------------------------------------------------------------------------------------------------------------------------------------------------------------------------------------------------------------------------------|
| 1      | $V_{AatoSUC} = v_{max_{AatoSUC}} \cdot \frac{[AKG]}{[AKG] + km_{AatoSUC_{AKG}}} \cdot \frac{\frac{[ATP]}{[ADP]}}{\frac{[ATP]}{[ADP]} + km_{AatoSUC_{ATP}}} \cdot \frac{\frac{[NAD]}{[NADH]}}{\frac{[NAD]}{[NADH]} + km_{AatoSUC_{NAD}}} \cdot \frac{\frac{[NADP]}{[NADPH]}}{\frac{[NADP]}{[NADPH]} + km_{AatoSUC_{NADP}}} \cdot \frac{[EILE]}{[EILE] + km_{AatoSUC_{EILE}}} \cdot \frac{[EVAL]}{[EVAL] + km_{AatoSUC_{EVAL}}} \cdot \frac{[ELEU]}{[ELEU] + km_{AatoSUC_{ELEU}}} \cdot \frac{[ETYR]}{[ETYR] + km_{AatoSUC_{ETYR}}} \cdot \frac{[ELYS]}{[ELYS] + km_{AatoSUC_{ELYS}}}$ |
| 2      | $V_{AK} = v_{max_{AK}} \cdot \frac{[AMP]}{[AMP] + km_{AK_{AMP}}} \cdot \frac{\frac{[ATP]}{[ADP]}}{\frac{[ATP]}{[ADP]} + km_{AK_{ATP}}} - v_{maxr_{AK}} \cdot \frac{\frac{[ADP]}{[ATP]}}{\frac{[ADP]}{[ATP]} + km_{AK_{ADP}}}$                                                                                                                                                                                                                                                                                                                                                        |
| 3      | $V_{AKGDH} = v_{max_{AKGDH}} \cdot \frac{[AKG]}{[AKG] + km_{AKGDH_{AKG}}} \cdot \frac{\frac{[NAD]}{[NADH]}}{\frac{[NAD]}{[NADH]} + km_{AKGDH_{NAD}}}$                                                                                                                                                                                                                                                                                                                                                                                                                                |
| 4      | $V_{ALATA} = v_{max_{ALATA}} \cdot \frac{[GLU]}{[GLU] + km_{ALATA_{GLU}}} \cdot \frac{[PYR]}{[PYR] + km_{ALATA_{PYR}}} - v_{maxr_{ALATA}} \cdot \frac{[AKG]}{[AKG] + km_{ALATA_{AKG}}} \cdot \frac{[EALA]}{[EALA] + km_{ALATA_{EALA}}}$                                                                                                                                                                                                                                                                                                                                              |
| 5      | $V_{ARG1} = v_{max_{ARG1}} \cdot \frac{[ARG]}{[ARG] + km_{ARG1_{ARG}}}$                                                                                                                                                                                                                                                                                                                                                                                                                                                                                                              |

Table S5. Flux kinetic equations (continued)

| Number | Flux                                                                                                                                                                                   |
|--------|----------------------------------------------------------------------------------------------------------------------------------------------------------------------------------------|
| 6      | $V_{ARGt} = v_{max_{ARGt}} \cdot \frac{\frac{[ATP]}{[ADP]}}{\frac{[ATP]}{[ADP]} + km_{ARGt_{ATP}}} \cdot \frac{[EARG]}{[EARG] + km_{ARGt_{EARG}}}$                                     |
| 7      | $V_{ASL} = v_{max_{ASL}} \cdot \frac{[AS]}{[AS] + km_{ASL_{AS}}}$                                                                                                                      |
| 8      | $V_{ASN} = v_{max_{ASN}} \cdot \frac{[ASN]}{[ASN] + km_{ASN_{ASN}}} - v_{max_{r_{ASN}}} \cdot \frac{[ASP]}{[ASP] + km_{ASN_{ASP}}} \cdot \frac{[NH4]}{[NH4] + km_{ASN_{NH4}}}$         |
| 9      | $V_{ASNt} = v_{max_{ASNt}} \cdot \frac{\frac{[ATP]}{[ADP]}}{\frac{[ATP]}{[ADP]} + km_{ASNt_{ATP}}} \cdot \frac{[EASN]}{[EASN] + km_{ASNt_{EASN}}}$                                     |
| 10     | $V_{ASPt} = v_{max_{ASPt}} \cdot \frac{\frac{[ATP]}{[ADP]}}{\frac{[ATP]}{[ADP]} + km_{ASPt_{ATP}}} \cdot \frac{[EASP]}{[EASP] + km_{ASPt_{EASP}}}$                                     |
| 11     | $V_{ASS} = v_{max_{ASS}} \cdot \frac{[ASP]}{[ASP] + km_{ASS_{ASP}}} \cdot \frac{\frac{[ATP]}{[ADP]}}{\frac{[ATP]}{[ADP]} + km_{ASS_{ATP}}} \cdot \frac{[CTR]}{[CTR] + km_{ASS_{CTR}}}$ |

Table S5. Flux kinetic equations (continued)

| Number | Flux                                                                                                                                                                                                                                                                    |
|--------|-------------------------------------------------------------------------------------------------------------------------------------------------------------------------------------------------------------------------------------------------------------------------|
| 12     | $V_{ASTA} = v_{max_{ASTA}} \cdot \frac{[AKG]}{[AKG] + km_{ASTA_{AKG}}} \cdot \frac{[ASP]}{[ASP] + km_{ASTA_{ASP}}} - v_{max_{r_{ASTA}}} \cdot \frac{[GLU]}{[GLU] + km_{ASTA_{GLU}}} \cdot \frac{[OXA]}{[OXA] + km_{ASTA_{OXA}}}$                                        |
| 13     | $V_{ATPase} = v_{max_{ATPase}} \cdot \frac{[ATP]}{[ATP] + km_{ATPase_{ATP}}}$                                                                                                                                                                                           |
| 14     | $V_{CITS} = v_{max_{CITS}} \cdot \frac{[CIT]}{[CIT] + km_{CITS_{CIT}}} \cdot \frac{\frac{[NAD]}{[NADH]}}{\frac{[NAD]}{[NADH]} + km_{CITS_{NAD}}}$                                                                                                                       |
| 15     | $V_{CK} = v_{max_{CK}} \cdot \frac{\frac{[ADP]}{[ATP]}}{\frac{[ADP]}{[ATP]} + km_{CK_{ADP}}} \cdot \frac{[PCr]}{[PCr] + km_{CK_{PCr}}} - v_{max_{r_{CK}}} \cdot \frac{\frac{[ATP]}{[ADP]}}{\frac{[ATP]}{[ADP]} + km_{CK_{ATP}}} \cdot \frac{[Cr]}{[Cr] + km_{CK_{Cr}}}$ |
| 16     | $V_{CS} = v_{max_{CS}} \cdot \frac{[ACCOA]}{[ACCOA] + km_{CS_{ACCOA}}} \cdot \frac{[OXA]}{[OXA] + km_{CS_{OXA}}}$                                                                                                                                                       |
| 17     | $V_{FUM} = v_{max_{FUM}} \cdot \frac{[FUM]}{[FUM] + km_{FUM_{FUM}}}$                                                                                                                                                                                                    |

Table S5. Flux kinetic equations (continued)

| Number | Flux                                                                                                                                                                                                                                                                                                                                   |
|--------|----------------------------------------------------------------------------------------------------------------------------------------------------------------------------------------------------------------------------------------------------------------------------------------------------------------------------------------|
| 18     | $V_{G6PDH} = v_{max_{G6PDH}} \cdot \frac{[G6P]}{[G6P] + km_{G6PDH_{G6P}}} \cdot \frac{\frac{[NADP]}{[NADPH]}}{\frac{[NADP]}{[NADPH]} + km_{G6PDH_{NADP}}}$                                                                                                                                                                             |
| 19     | $V_{GLDH} = v_{max_{GLDH}} \cdot \frac{[GLU]}{[GLU] + km_{GLDH_{GLU}}} \cdot \frac{\frac{[NAD]}{[NADH]}}{\frac{[NAD]}{[NADH]} + km_{GLDH_{NAD}}} - v_{maxr_{GLDH}} \cdot \frac{[AKG]}{[AKG] + km_{GLDH_{AKG}}} \cdot \frac{\frac{[NADH]}{[NAD]}}{\frac{[NADH]}{[NAD]} + km_{GLDH_{NADH}}} \cdot \frac{[NH4]}{[NH4] + km_{GLDH_{NH4}}}$ |
| 20     | $V_{GLN} = v_{max_{GLN}} \cdot \frac{[GLN]}{[GLN] + km_{GLN_{GLN}}} - v_{maxr_{GLN}} \cdot \frac{[GLU]}{[GLU] + km_{GLN_{GLU}}} \cdot \frac{[NH4]}{[NH4] + km_{GLN_{NH4}}}$                                                                                                                                                            |
| 21     | $V_{GLNt} = v_{max_{GLNt}} \cdot \frac{\frac{[ATP]}{[ADP]}}{\frac{[ATP]}{[ADP]} + km_{GLNt_{ATP}}} \cdot \frac{[EGLN]}{[EGLN] + km_{GLNt_{EGLN}}}$                                                                                                                                                                                     |
| 22     | $V_{GLUt} = v_{max_{GLUt}} \cdot \frac{\frac{[ADP]}{[ATP]}}{\frac{[ADP]}{[ATP]} + km_{GLUt_{ADP}}} \cdot \frac{[GLU]}{[GLU] + km_{GLUt_{GLU}}}$                                                                                                                                                                                        |



Table S5. Flux kinetic equations (continued)

| Number | Flux                                                                                                                                                                                                                                                                                                                                                                                                                                                                                                                                                                                                                                                                                                                                                                                                                                                                                                                                                                                                                                                                                                                                                                    |
|--------|-------------------------------------------------------------------------------------------------------------------------------------------------------------------------------------------------------------------------------------------------------------------------------------------------------------------------------------------------------------------------------------------------------------------------------------------------------------------------------------------------------------------------------------------------------------------------------------------------------------------------------------------------------------------------------------------------------------------------------------------------------------------------------------------------------------------------------------------------------------------------------------------------------------------------------------------------------------------------------------------------------------------------------------------------------------------------------------------------------------------------------------------------------------------------|
| 23     | $V_{GLYt} = v_{max_{GLYt}} * \frac{\frac{[ATP]}{[ADP]}}{\frac{[ATP]}{[ADP]} + km_{GLYt_{ATP}}} * \frac{[EGLY]}{[EGLY] + km_{GLYt_{EGLY}}}$                                                                                                                                                                                                                                                                                                                                                                                                                                                                                                                                                                                                                                                                                                                                                                                                                                                                                                                                                                                                                              |
| 24     | $V_{growth} = v_{max_{growth}} * \frac{\frac{[ATP]}{[ADP]}}{\frac{[ATP]}{[ADP]} + km_{growth_{ATP}}} * \frac{[CIT]}{[CIT] + km_{growth_{CIT}}} * \frac{[G6P]}{[G6P] + km_{growth_{G6P}}} * \frac{[R5P]}{[R5P] + km_{growth_{R5P}}} * \frac{[EARG]}{[EARG] + km_{growth_{EARG}}} * \frac{[ETRP]}{[ETRP] + km_{growth_{ETRP}}} * \frac{[EGLU]}{[EGLU] + km_{growth_{EGLU}}} * \frac{[EGLN]}{[EGLN] + km_{growth_{EGLN}}} * \frac{[EALA]}{[EALA] + km_{growth_{EALA}}} * \frac{[ESER]}{[ESER] + km_{growth_{ESER}}} * \frac{[EASN]}{[EASN] + km_{growth_{EASN}}} * \frac{[EASP]}{[EASP] + km_{growth_{EASP}}} * \frac{[EILE]}{[EILE] + km_{growth_{EILE}}} * \frac{[EVAL]}{[EVAL] + km_{growth_{EVAL}}} * \frac{[ETHR]}{[ETHR] + km_{growth_{ETHR}}} * \frac{[ELEU]}{[ELEU] + km_{growth_{ELEU}}} * \frac{[ETYR]}{[ETYR] + km_{growth_{ETYR}}} * \frac{[ECYS]}{[ECYS] + km_{growth_{ECYS}}} * \frac{[ELYS]}{[ELYS] + km_{growth_{ELYS}}} * \frac{[EPRO]}{[EPRO] + km_{growth_{EPRO}}} * \frac{[EMET]}{[EMET] + km_{growth_{EMET}}} * \frac{[EPHE]}{[EPHE] + km_{growth_{EPHE}}} * \frac{[EHIS]}{[EHIS] + km_{growth_{EHIS}}} * \frac{[EGLY]}{[EGLY] + km_{growth_{EGLY}}}$ |

Table S5. Flux kinetic equations (continued)

| Number | Flux                                                                                                                                                                                                                                                                                                                                                                                                                                    |
|--------|-----------------------------------------------------------------------------------------------------------------------------------------------------------------------------------------------------------------------------------------------------------------------------------------------------------------------------------------------------------------------------------------------------------------------------------------|
| 25     | $V_{HISARGTA} = v_{max_{HISARGTA}} * \frac{[AKG]}{[AKG] + km_{HISARGTA_{AKG}}} * \frac{[EARG]}{[EARG] + km_{HISARGTA_{EARG}}} * \frac{[EHIS]}{[EHIS] + km_{HISARGTA_{EHIS}}}$                                                                                                                                                                                                                                                           |
| 26     | $V_{HK} = v_{max_{HK}} * \frac{\frac{[ATP]}{[ADP]}}{\frac{[ATP]}{[ADP]} + km_{HK_{ATP}}} * \frac{[EGLC] * \left(1 + \frac{beta_{HK_{AMP_{ATP}}} * \frac{[AMP]}{[ATP]}}{alpha_{HK_{AMP_{ATP}}} * ka_{HK_{AMP_{ATP}}}}\right)}{km_{HK_{EGLC}} * \left(1 + \frac{[AMP]}{ka_{HK_{AMP_{ATP}}}}\right) + [EGLC] * \left(1 + \frac{[AMP]}{alpha_{HK_{AMP_{ATP}}} * ka_{HK_{AMP_{ATP}}}}\right)} * \frac{ki_{HK_{G6P}}}{ki_{HK_{G6P}} + [G6P]}$ |
| 27     | $V_{IDO} = v_{max_{IDO}} * \frac{[ETRP]}{[ETRP] + km_{IDO_{ETRP}}}$                                                                                                                                                                                                                                                                                                                                                                     |
| 28     | $V_{iNOS} = v_{max_{iNOS}} * \frac{[ARG]}{[ARG] + km_{iNOS_{ARG}}} * \frac{\frac{[NADP]}{[NADPH]}}{\frac{[NADP]}{[NADPH]} + km_{iNOS_{NADP}}}$                                                                                                                                                                                                                                                                                          |

Table S5. Flux kinetic equations (continued)

| Number | Flux                                                                                                                                                                                                                                                                                                                                                                                                                     |
|--------|--------------------------------------------------------------------------------------------------------------------------------------------------------------------------------------------------------------------------------------------------------------------------------------------------------------------------------------------------------------------------------------------------------------------------|
| 29     | $V_{KOT} = v_{max_{KOT}} * \frac{[AKG]}{[AKG] + km_{KOT_{AKG}}} * \frac{[KYN]}{[KYN] + km_{KOT_{KYN}}}$                                                                                                                                                                                                                                                                                                                  |
| 30     | $V_{LDH} = v_{max_{LDH}} * \frac{\frac{[NADH]}{[NAD]}}{\frac{[NADH]}{[NAD]} + km_{LDH_{NADH}}} * \frac{[PYR] * \left( 1 + \frac{beta_{LDH_{AMP_{ATP}}} * \frac{[AMP]}{[ATP]}}{alpha_{LDH_{AMP_{ATP}}} * ka_{LDH_{AMP_{ATP}}} \right)}{km_{LDH_{PYR}} * \left( 1 + \frac{[AMP]}{ka_{LDH_{AMP_{ATP}}} * [ATP]} \right) + [PYR] * \left( 1 + \frac{[AMP]}{alpha_{LDH_{AMP_{ATP}}} * ka_{LDH_{AMP_{ATP}}} * [ATP]} \right)}$ |
| 31     | $V_{leak} = v_{max_{leak}} * \frac{[NADH]}{[NADH] + km_{leak_{NADH}}}$                                                                                                                                                                                                                                                                                                                                                   |
| 32     | $V_{ME} = v_{max_{ME}} * \frac{[MAL]}{[MAL] + km_{ME_{MAL}}} * \frac{\frac{[NAD]}{[NADH]}}{\frac{[NAD]}{[NADH]} + km_{ME_{NAD}}}$                                                                                                                                                                                                                                                                                        |
| 33     | $V_{MLD} = v_{max_{MLD}} * \frac{[MAL]}{[MAL] + km_{MLD_{MAL}}} * \frac{\frac{[NAD]}{[NADH]}}{\frac{[NAD]}{[NADH]} + km_{MLD_{NAD}}}$                                                                                                                                                                                                                                                                                    |

Table S5. Flux kinetic equations (continued)

| Number | Flux                                                                                                                                                                       |
|--------|----------------------------------------------------------------------------------------------------------------------------------------------------------------------------|
| 34     | $V_{NADPHox} = v_{max_{NADPHox}} * \frac{[NADPH]}{[NADPH] + km_{NADPHox_{NADPH}}}$                                                                                         |
| 35     | $V_{NAT} = v_{max_{NAT}} * \frac{\frac{[ATP]}{[ADP]}}{\frac{[ATP]}{[ADP]} + km_{NAT_{ATP}}} * \frac{[GLN]}{[GLN] + km_{NAT_{GLN}}} * \frac{[R5P]}{[R5P] + km_{NAT_{R5P}}}$ |
| 36     | $V_{NHG} = v_{max_{NHG}} * \frac{\frac{[ATP]}{[ADP]}}{\frac{[ATP]}{[ADP]} + km_{NHG_{ATP}}} * \frac{\frac{[NAD]}{[NADH]}}{\frac{[NAD]}{[NADH]} + km_{NHG_{NAD}}}$          |
| 37     | $V_{OCT} = v_{max_{OCT}} * \frac{[ORN]}{[ORN] + km_{OCT_{ORN}}}$                                                                                                           |
| 38     | $V_{PC} = v_{max_{PC}} * \frac{\frac{[ATP]}{[ADP]}}{\frac{[ATP]}{[ADP]} + km_{PC_{ATP}}} * \frac{[PYR]}{[PYR] + km_{PC_{PYR}}}$                                            |

Table S5. Flux kinetic equations (continued)

| Number | Flux                                                                                                                                                                                                                                                                                                                                                                                                   |
|--------|--------------------------------------------------------------------------------------------------------------------------------------------------------------------------------------------------------------------------------------------------------------------------------------------------------------------------------------------------------------------------------------------------------|
| 39     | $V_{PDH} = v_{max_{PDH}} * \frac{\frac{[NAD]}{[NADH]}}{\frac{[NAD]}{[NADH]} + km_{PDH_{NAD}}} * \frac{[PYR]}{[PYR] + km_{PDH_{PYR}}}$                                                                                                                                                                                                                                                                  |
| 40     | $V_{PFK} = v_{max_{PFK}} * \frac{\frac{[ATP]}{[ADP]}}{\frac{[ATP]}{[ADP]} + km_{PFK_{ATP}}} * \frac{[F6P] * \left( 1 + \frac{beta_{PFK_{AMP_{ATP}}} * \frac{[AMP]}{[ATP]}}{alpha_{PFK_{AMP_{ATP}}} * ka_{PFK_{AMP_{ATP}}}} \right)}{km_{PFK_{F6P}} * \left( 1 + \frac{[AMP]}{ka_{PFK_{AMP_{ATP}}}} \right) + [F6P] * \left( 1 + \frac{[AMP]}{alpha_{PFK_{AMP_{ATP}}} * ka_{PFK_{AMP_{ATP}}}} \right)}$ |
| 41     | $V_{PGI} = v_{max_{PGI}} * \frac{[G6P]}{[G6P] + km_{PGI_{G6P}}} * \frac{ki_{PGI_{PEP}}}{ki_{PGI_{PEP}} + [PEP]} - v_{max_{r_{PGI}}} * \frac{[F6P]}{[F6P] + km_{PGI_{F6P}}}$                                                                                                                                                                                                                            |
| 42     | $V_{PGK} = v_{max_{PGK}} * \frac{\frac{[ADP]}{[ATP]}}{\frac{[ADP]}{[ATP]} + km_{PGK_{ADP}}} * \frac{[GAP]}{[GAP] + km_{PGK_{GAP}}} * \frac{\frac{[NAD]}{[NADH]}}{\frac{[NAD]}{[NADH]} + km_{PGK_{NAD}}}$                                                                                                                                                                                               |

Table S5. Flux kinetic equations (continued)

| Number | Flux                                                                                                                                                                                                                                                                                                                                 |
|--------|--------------------------------------------------------------------------------------------------------------------------------------------------------------------------------------------------------------------------------------------------------------------------------------------------------------------------------------|
| 43     | $V_{PK} = v_{max_{PK}} * \frac{\frac{[ADP]}{[ATP]}}{\frac{[ADP]}{[ATP]} + km_{PK_{ADP}}} * \frac{[PEP] * \left(1 + \frac{beta_{PK_{F6P}} * [F6P]}{alpha_{PK_{F6P}} * ka_{PK_{F6P}}}\right)}{km_{PK_{PEP}} * \left(1 + \frac{[F6P]}{ka_{PK_{F6P}}}\right) + [PEP] * \left(1 + \frac{[F6P]}{alpha_{PK_{F6P}} * ka_{PK_{F6P}}}\right)}$ |
| 44     | $V_{PPRibP} = v_{max_{PPRibP}} * \frac{[ASP]}{[ASP] + km_{PPRibP_{ASP}}} * \frac{\frac{[ATP]}{[ADP]}}{\frac{[ATP]}{[ADP]} + km_{PPRibP_{ATP}}} * \frac{[GLN]}{[GLN] + km_{PPRibP_{GLN}}} * \frac{[GLY]}{[GLY] + km_{PPRibP_{GLY}}} * \frac{[R5P]}{[R5P] + km_{PPRibP_{R5P}}}$                                                        |
| 45     | $V_{resp} = v_{max_{resp}} * \frac{[ADP]}{[ADP] + km_{resp_{ADP}}} * \frac{[NADH]}{[NADH] + km_{resp_{NADH}}}$                                                                                                                                                                                                                       |
| 46     | $V_{SCOAS} = v_{max_{SCOAS}} * \frac{\frac{[ADP]}{[ATP]}}{\frac{[ADP]}{[ATP]} + km_{SCOAS_{ADP}}} * \frac{[SCOA]}{[SCOA] + km_{SCOAS_{SCOA}}}$                                                                                                                                                                                       |
| 47     | $V_{SDH} = v_{max_{SDH}} * \frac{\frac{[ADP]}{[ATP]}}{\frac{[ADP]}{[ATP]} + km_{SDH_{ADP}}} * \frac{\frac{[NAD]}{[NADH]}}{\frac{[NAD]}{[NADH]} + km_{SDH_{NAD}}} * \frac{[SUC]}{[SUC] + km_{SDH_{SUC}}}$                                                                                                                             |

Table S5. Flux kinetic equations (continued)

| Number | Flux                                                                |
|--------|---------------------------------------------------------------------|
| 48     | $V_{SDHH} = v_{max_{SDHH}} * \frac{[ESER]}{[ESER] + km_{SDHHESER}}$ |
| 49     | $V_{TK} = v_{max_{TK}} * \frac{[R5P]}{[R5P] + km_{TKR5P}}$          |

Table S6. Mass balances on metabolite concentrations

| Equation number | Differential equations                                                                                                                                                                                                                                                                                                                                      |
|-----------------|-------------------------------------------------------------------------------------------------------------------------------------------------------------------------------------------------------------------------------------------------------------------------------------------------------------------------------------------------------------|
| 1               | $\frac{d[ACCOA]}{dt} = (8 * V_{AAtoSUC}) - V_{CS} + V_{PDH} - (V_{growth} * [ACCOA])$                                                                                                                                                                                                                                                                       |
| 2               | $\begin{aligned} \frac{d[ADP]}{dt} = & V_{AAtoSUC} + (2 * V_{AK}) + V_{ARGt} + V_{ASNt} + V_{ASPt} + V_{ATPase} - V_{CK} + V_{GLNt} - V_{GLUt} + V_{GLYt} + V_{HK} + V_{NHG} + V_{PC} \\ & + V_{PFK} - V_{PGK} - V_{PK} + (4 * V_{PPRibP}) - (4 * V_{resp}) - V_{SCOAS} - V_{SDH} - (V_{growth} * [ADP]) \\ & + (V_{growthADP} * V_{growth}) \end{aligned}$ |
| 3               | $\frac{d[AKG]}{dt} = -(7 * V_{AAtoSUC}) - V_{AKGDH} + V_{ALATA} - V_{ASTA} + V_{CITS} + V_{GLDH} - V_{HISARGTA} - V_{KOT} - (V_{growth} * [AKG])$                                                                                                                                                                                                           |
| 4               | $\frac{d[AMP]}{dt} = -V_{AK} + V_{ASS} + V_{NAT} + (2 * V_{PPRibP}) - (V_{growth} * [AMP])$                                                                                                                                                                                                                                                                 |
| 5               | $\frac{d[ARG]}{dt} = -V_{ARG1} + V_{ARGt} + V_{ASL} - V_{iNOS} - (V_{growth} * [ARG])$                                                                                                                                                                                                                                                                      |
| 6               | $\frac{d[AS]}{dt} = -V_{ASL} + V_{ASS} - (V_{growth} * [AS])$                                                                                                                                                                                                                                                                                               |
| 7               | $\frac{d[ASN]}{dt} = -V_{ASN} + V_{ASNt} - (V_{growth} * [ASN])$                                                                                                                                                                                                                                                                                            |



Table S6. Mass balances on metabolite concentrations (continued)

| Equation number | Differential equations                                                                                                                                                                                                                                                                                                                                                              |
|-----------------|-------------------------------------------------------------------------------------------------------------------------------------------------------------------------------------------------------------------------------------------------------------------------------------------------------------------------------------------------------------------------------------|
| 8               | $\frac{d[ASP]}{dt} = V_{ASN} + V_{ASPt} - V_{ASS} - V_{ASTA} - V_{PPRibP} - (V_{growth} * [ASP])$                                                                                                                                                                                                                                                                                   |
| 9               | $\begin{aligned} \frac{d[ATP]}{dt} = & -V_{AAtoSUC} - V_{AK} - V_{ARGt} - V_{ASNt} - V_{ASPt} - V_{ASS} - V_{ATPase} + V_{CK} - V_{GLNt} + V_{GLUt} - V_{GLYt} - V_{HK} \\ & - (2 * V_{NAT}) - V_{NHG} - V_{PC} - V_{PFK} + V_{PGK} + V_{PK} - (5 * V_{PPRibP}) + (4 * V_{resp}) + V_{SCOAS} + V_{SDH} \\ & - (V_{growth} * [ATP]) - (V_{growth_{ATP}} * V_{growth}) \end{aligned}$ |
| 10              | $\frac{d[CIT]}{dt} = -V_{CITS} + V_{CS} - (V_{growth} * [CIT]) - (V_{growth_{CIT}} * V_{growth})$                                                                                                                                                                                                                                                                                   |
| 11              | $\frac{d[F6P]}{dt} = -V_{PFK} + V_{PGI} + (2 * V_{TK}) - (V_{growth} * [F6P])$                                                                                                                                                                                                                                                                                                      |
| 12              | $\frac{d[FUM]}{dt} = V_{ASL} - V_{FUM} + V_{PPRibP} + V_{SDH} - (V_{growth} * [FUM])$                                                                                                                                                                                                                                                                                               |
| 13              | $\frac{d[G6P]}{dt} = -V_{G6PDH} + V_{HK} - V_{PGI} - (V_{growth} * [G6P]) - (V_{growth_{G6P}} * V_{growth})$                                                                                                                                                                                                                                                                        |
| 14              | $\frac{d[GAP]}{dt} = (2 * V_{PFK}) - V_{PGK} + V_{TK} - (V_{growth} * [GAP])$                                                                                                                                                                                                                                                                                                       |
| 15              | $\frac{d[GLN]}{dt} = -V_{GLN} + V_{GLNt} - V_{NAT} - (2 * V_{PPRibP}) - (V_{growth} * [GLN])$                                                                                                                                                                                                                                                                                       |

Table S6. Mass balances on metabolite concentrations (continued)

| Equation number | Differential equations                                                                                                                                                                                                      |
|-----------------|-----------------------------------------------------------------------------------------------------------------------------------------------------------------------------------------------------------------------------|
| 16              | $\frac{d[GLU]}{dt} = (4 * V_{AAtoSUC}) - V_{ALATA} + V_{ASTA} - V_{GLDH} + V_{GLN} - V_{GLUT} + (4 * V_{HISARGTA}) + V_{KOT} + V_{NAT} + (2 * V_{PPRibP}) - (V_{growth} * [GLU])$                                           |
| 17              | $\frac{d[GLY]}{dt} = V_{GLYt} - V_{PPRibP} - (V_{growth} * [GLY])$                                                                                                                                                          |
| 18              | $\frac{d[MAL]}{dt} = V_{AAtoSUC} + V_{FUM} - V_{ME} - V_{MLD} - (V_{growth} * [MAL])$                                                                                                                                       |
| 19              | $\frac{d[NAD]}{dt} = -(9 * V_{AAtoSUC}) - V_{AKGDH} - V_{CITS} - V_{GLDH} + V_{LDH} + (2 * V_{leak}) - V_{ME} - V_{MLD} + V_{NAT} - V_{NHG} - V_{PDH} - V_{PGK} + (2 * V_{resp}) - (0.66 * V_{SDH}) - (V_{growth} * [NAD])$ |
| 20              | $\frac{d[NADH]}{dt} = (9 * V_{AAtoSUC}) + V_{AKGDH} + V_{CITS} + V_{GLDH} - V_{LDH} - (2 * V_{leak}) + V_{ME} + V_{MLD} + V_{PDH} + V_{PGK} - (2 * V_{resp}) + (0.66 * V_{SDH}) - (V_{growth} * [NADH])$                    |
| 21              | $\frac{d[NADP]}{dt} = -(2 * V_{AAtoSUC}) - (2 * V_{G6PDH}) - V_{iNOS} + V_{NADPHox} + V_{NHG} - (V_{growth} * [NADP])$                                                                                                      |
| 22              | $\frac{d[NADPH]}{dt} = (2 * V_{AAtoSUC}) + (2 * V_{G6PDH}) + V_{iNOS} - V_{NADPHox} - (V_{growth} * [NADPH])$                                                                                                               |
| 23              | $\frac{d[OXA]}{dt} = V_{ASTA} - V_{CS} + V_{MLD} + V_{PC} - (V_{growth} * [OXA])$                                                                                                                                           |

Table S6. Mass balances on metabolite concentrations (continued)

| Equation number | Differential equations                                                                                                               |
|-----------------|--------------------------------------------------------------------------------------------------------------------------------------|
| 24              | $\frac{d[PCr]}{dt} = -V_{CK} - (V_{growth} * [PCr])$                                                                                 |
| 25              | $\frac{d[PEP]}{dt} = V_{PGK} - V_{PK} - (V_{growth} * [PEP])$                                                                        |
| 26              | $\frac{d[PYR]}{dt} = -V_{ALATA} - V_{LDH} + V_{ME} - V_{PC} - V_{PDH} + V_{PK} + V_{SDHH} - (V_{growth} * [PYR])$                    |
| 27              | $\frac{d[R5P]}{dt} = V_{G6PDH} - (2 * V_{NAT}) - V_{PPRibP} - (3 * V_{TK}) - (V_{growth} * [R5P]) - (V_{growth_{R5P}} * V_{growth})$ |
| 28              | $\frac{d[SCOA]}{dt} = V_{AKGDH} - V_{SCOAS} - (V_{growth} * [SCOA])$                                                                 |
| 29              | $\frac{d[SUC]}{dt} = (3 * V_{AAtoSUC}) + V_{SCOAS} - V_{SDH} - (V_{growth} * [SUC])$                                                 |
| 30              | $\frac{d[EARG]}{dt} = (-V_{ARGt} - V_{HISARGTA} - V_{growth_{EARG}} * V_{growth}) * ([X] * 1000)$                                    |
| 31              | $\frac{d[ORN]}{dt} = (V_{ARG1} - V_{OCT}) * ([X] * 1000)$                                                                            |
| 32              | $\frac{d[CTR]}{dt} = (-V_{ASS} + V_{iNOS} + V_{OCT}) * ([X] * 1000)$                                                                 |

**Table S6.** Mass balances on metabolite concentrations (continued)

| Equation number | Differential equations                                                          |
|-----------------|---------------------------------------------------------------------------------|
| 33              | $\frac{d[EGLC]}{dt} = (-V_{HK}) * ([X] * 1000)$                                 |
| 34              | $\frac{d[ELAC]}{dt} = (V_{LDH}) * ([X] * 1000)$                                 |
| 35              | $\frac{d[ETRP]}{dt} = (-V_{IDO} - V_{growthETRP} * V_{growth}) * ([X] * 1000)$  |
| 36              | $\frac{d[KYN]}{dt} = (V_{IDO} - V_{KOT}) * ([X] * 1000)$                        |
| 37              | $\frac{d[KYT]}{dt} = (V_{KOT}) * ([X] * 1000)$                                  |
| 38              | $\frac{d[EGLU]}{dt} = (V_{GLUt} - V_{growthEGLU} * V_{growth}) * ([X] * 1000)$  |
| 39              | $\frac{d[EGLN]}{dt} = (-V_{GLNt} - V_{growthEGLN} * V_{growth}) * ([X] * 1000)$ |
| 40              | $\frac{d[EALA]}{dt} = (V_{ALATA} - V_{growthEALA} * V_{growth}) * ([X] * 1000)$ |
| 41              | $\frac{d[ESER]}{dt} = (-V_{SDHH} - V_{growthESER} * V_{growth}) * ([X] * 1000)$ |

Table S6. Mass balances on metabolite concentrations (continued)

| Equation number | Differential equations                                                                                         |
|-----------------|----------------------------------------------------------------------------------------------------------------|
| 42              | $\frac{d[\text{EASN}]}{dt} = (-V_{\text{ASNt}} - V_{\text{growthEASN}} * V_{\text{growth}}) * ([X] * 1000)$    |
| 43              | $\frac{d[\text{EASP}]}{dt} = (-V_{\text{ASPt}} - V_{\text{growthEASP}} * V_{\text{growth}}) * ([X] * 1000)$    |
| 44              | $\frac{d[\text{EILE}]}{dt} = (-V_{\text{AAtoSUC}} - V_{\text{growthEILE}} * V_{\text{growth}}) * ([X] * 1000)$ |
| 45              | $\frac{d[\text{EVAL}]}{dt} = (-V_{\text{AAtoSUC}} - V_{\text{growthEVAL}} * V_{\text{growth}}) * ([X] * 1000)$ |
| 46              | $\frac{d[\text{ETHR}]}{dt} = (-V_{\text{growthETHR}} * V_{\text{growth}}) * ([X] * 1000)$                      |
| 47              | $\frac{d[\text{ELEU}]}{dt} = (-V_{\text{AAtoSUC}} - V_{\text{growthELEU}} * V_{\text{growth}}) * ([X] * 1000)$ |
| 48              | $\frac{d[\text{ETYS}]}{dt} = (-V_{\text{AAtoSUC}} - V_{\text{growthETYS}} * V_{\text{growth}}) * ([X] * 1000)$ |
| 49              | $\frac{d[\text{ECYS}]}{dt} = (-V_{\text{growthECYS}} * V_{\text{growth}}) * ([X] * 1000)$                      |
| 50              | $\frac{d[\text{ELYS}]}{dt} = (-V_{\text{AAtoSUC}} - V_{\text{growthELYS}} * V_{\text{growth}}) * ([X] * 1000)$ |

Table S6. Mass balances on metabolite concentrations (continued)

| Equation number | Differential equations                                                                                                                  |
|-----------------|-----------------------------------------------------------------------------------------------------------------------------------------|
| 51              | $\frac{d[\text{EPRO}]}{dt} = (-V_{\text{growthEPRO}} * V_{\text{growth}}) * ([X] * 1000)$                                               |
| 52              | $\frac{d[\text{EMET}]}{dt} = (-V_{\text{growthEMET}} * V_{\text{growth}}) * ([X] * 1000)$                                               |
| 53              | $\frac{d[\text{EPHE}]}{dt} = (-V_{\text{growthEPHE}} * V_{\text{growth}}) * ([X] * 1000)$                                               |
| 54              | $\frac{d[\text{EHIS}]}{dt} = (-V_{\text{HISARGTA}} - V_{\text{growthEHIS}} * V_{\text{growth}}) * ([X] * 1000)$                         |
| 55              | $\frac{d[\text{NH4}]}{dt} = (V_{\text{ASN}} + V_{\text{GLDH}} + V_{\text{GLN}} + V_{\text{HISARGTA}} + V_{\text{SDHH}}) * ([X] * 1000)$ |
| 56              | $\frac{d[\text{EGLY}]}{dt} = (-V_{\text{GLYt}} - V_{\text{growthEGLY}} * V_{\text{growth}}) * ([X] * 1000)$                             |
| 57              | $\frac{d[\text{UREA}]}{dt} = (V_{\text{ARG1}}) * ([X] * 1000)$                                                                          |
| 58              | $\frac{d[X]}{dt} = ([X] * V_{\text{growth}})$                                                                                           |
| 59              | $\frac{d[\text{NO}]}{dt} = (V_{\text{iNOS}}) * ([X] * 1000)$                                                                            |
| 60              | $\frac{d[\text{Cr}]}{dt} = (V_{\text{CK}}) * ([X] * 1000)$                                                                              |
